# Supplementary material for: Intra-Patient Heterogeneity of Circulating Tumor Cells and Circulating Tumor DNA in Blood of Melanoma Patients
Source: PubMed Central journal article supplement (PMC6896052; doi:10.3390/cancers11111685), 2019-10-29
Supplement: cancers-11-01685-s001.pdf [file cancers-11-01685-s001.pdf]

## Supplementary Materials: Intra-patient heterogeneity of circulating tumor cells and circulating tumor DNA in blood of melanoma patients

Katharina Gorges, Lisa Wiltfang, Tobias M. Gorges, Alexander Sartori, Lina Hildebrandt, Laura Keller, Beate Volkmer, Sven Peine, Anna Babayan, Ingrid Moll, Stefan W. Schneider, Sören Twarock, Peter Mohr, Jens W. Fischer and Klaus Pantel

Table S1. Overview CTC positive patients.

| Patient_ID | Sex | Age | Melanoma_Type | Mutational_Status | TNM       | Survival_Status | Detected_CTCs | Ulceration | S100 (µg/L) | LDH (U/L) | Number_of_Follow_Ups |
|------------|-----|-----|---------------|-------------------|-----------|-----------------|---------------|------------|-------------|-----------|----------------------|
| patient_1  | m   | 50  | SSM           | unknown           | T1bN0M0   | alive           | 2             | No         | 0.021       | 227       | 1                    |
| patient_2  | m   | 46  | nodular       | BRAF              | T3bN2cM0  | alive           | 3             | Yes        | 0.034       | NS        | 1                    |
| patient_3  | m   | 58  | NS            | unknown           | T3aN0M0   | alive           | 2             | No         | 0.039       | 272       | 1                    |
| patient_4  | m   | 57  | unknown       | BRAF              | TxN0M1c   | alive           | 4             | NS         | 0.058       | 143       | 5                    |
| patient_5  | m   | 65  | desmoplastic  | BRAF              | NS        | alive           | 1             | NS         | 0.061       | NS        | 2                    |
| patient_6  | f   | 71  | unknown       | none              | TxN0M1c   | alive           | 8             | NS         | 0.089       | 290       | 4                    |
| patient_7  | m   | 39  | unknown       | unknown           | TxNxM1c   | dead            | 4             | NS         | 0.09        | 804       | 1                    |
| patient_8  | f   | 88  | cutaneous     | BRAF              | T2aN1aM1b | alive           | 1             | No         | 0.11        | 211       | 1                    |
| patient_9  | m   | 74  | cutaneous     | BRAF              | T4N2bM1a  | alive           | 3             | NS         | 0.122       | 269       | 4                    |
| patient_10 | f   | 61  | nodular       | BRAF              | T3aN2cM0  | alive           | 1             | No         | 0.151       | NS        | 1                    |
| patient_11 | m   | 88  | cutaneous     | unknown           | T2aN2cM0  | dead            | 2             | No         | 0.254       | NS        | 1                    |
| patient_12 | m   | 69  | unknown       | NRAS              | TxNxM1a   | alive           | 3             | NS         | 0.27        | 217       | 1                    |
| patient_13 | f   | 69  | cutaneous     | BRAF              | T3bN2cM1c | alive           | 1             | Yes        | 0.394       | NS        | 1                    |
| patient_14 | m   | 46  | nodular       | BRAF              | T4aN3M1c  | dead            | 2             | No         | 0.769       | 213       | 1                    |
| patient_15 | f   | NS  | cutaneous     | BRAF              | T4aN2cM0  | alive           | 1             | No         | 0.9         | 216       | 1                    |
| patient_16 | m   | 66  | cutaneous     | none              | T4bN0M1c  | dead            | 1             | Yes        | 1.52        | 219       | 1                    |
| patient_17 | m   | 74  | unknown       | BRAF              | TxNxM1c   | dead            | 3             | NS         | 9.463       | 680       | 1                    |
| patient_18 | f   | 52  | cutaneous     | BRAF              | T3bN1aM1c | dead            | 62            | Yes        | 19.71       | 493       | 1                    |
| patient_19 | f   | 34  | SSM           | NRAS              | T1bN1aMx  | alive           | 3             | Yes        | NS          | 160       | 1                    |
| patient_20 | m   | 44  | uveal         | unknown           | TxN0M1c   | alive           | 5             | NS         | NS          | 166       | 2                    |
| patient_21 | m   | 76  | SSM           | unknown           | T1aN0Mx   | alive           | 1             | No         | NS          | NS        | 1                    |
| patient_22 | m   | 76  | unknown       | BRAF              | TxNxM1a   | alive           | 3             | NS         | NS          | NS        | 2                    |
| patient_23 | m   | 62  | cutaneous     | BRAF              | T1bN2M1c  | dead            | 1             | Yes        | NS          | NS        | 1                    |
| patient_24 | m   | 58  | nodular       | BRAF              | T4bN3M1a  | alive           | 1             | NS         | NS          | NS        | 4                    |
| patient_25 | f   | 76  | amelanotic    | unknown           | T4bN0M0   | alive           | 4             | NS         | NS          | NS        | 4                    |
| patient_26 | f   | 85  | amelanotic    | NRAS              | T4bN3M0   | dead            | 3             | NS         | NS          | NS        | 4                    |

|            |   |    |         |      |         |      |   |    |    |    |   |
|------------|---|----|---------|------|---------|------|---|----|----|----|---|
| patient_27 | f | 81 | nodular | NRAS | T4bN0M0 | dead | 6 | NS | NS | NS | 3 |
|------------|---|----|---------|------|---------|------|---|----|----|----|---|

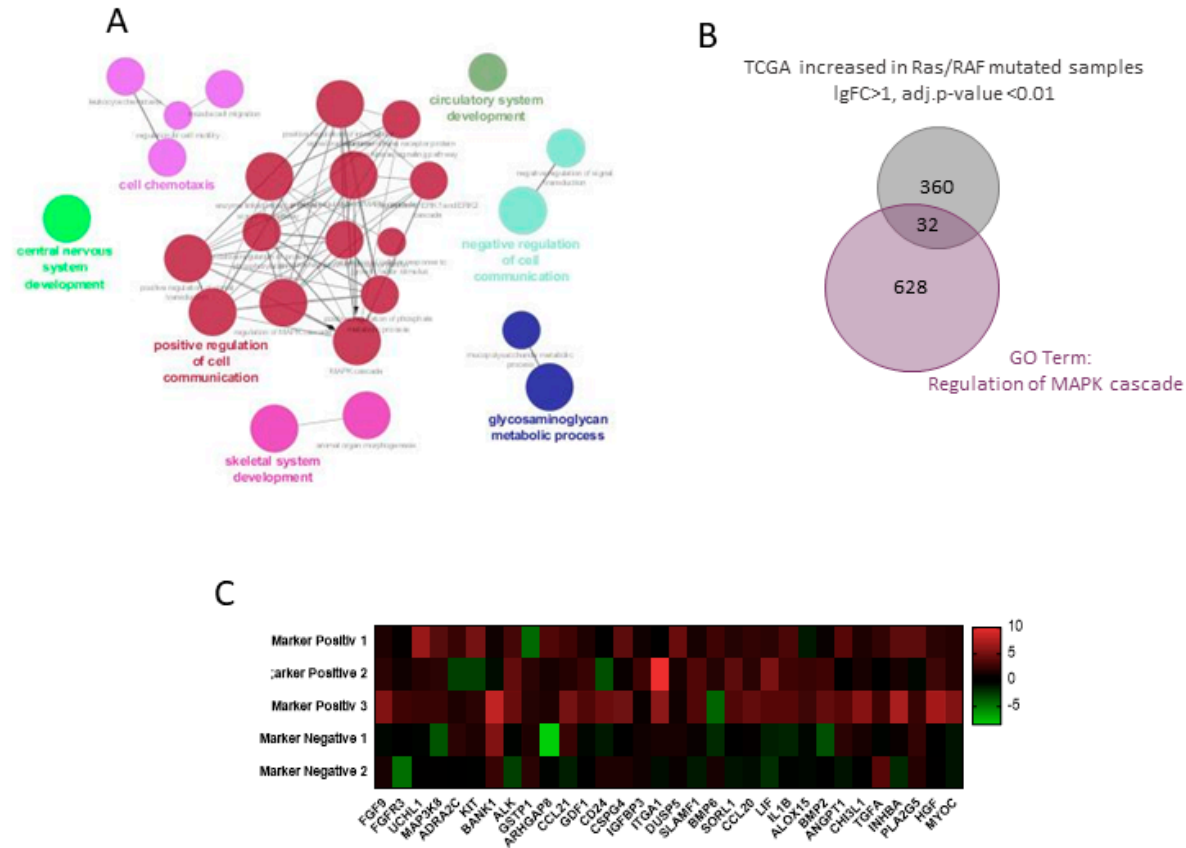

**Figure S1.** Pathway analysis in the TCGA cohort. mRNA analysis of single cells (A) GO-Terms enriched in Ras/RAF mutated samples from the TCGA cohort. Analysis was performed using Cytoscape. (B) Venn-diagram of genes significantly increased in Ras/RAF mutated samples compared to non-mutated samples (TCGA) and genes listed in the GO-term “Regulation of MAPK cascade”. (C) mRNA expression analysis of marker negative and marker positive single cells.
